# Supplementary material for: Radiocesium Transfer in Forest Insect Communities after the Fukushima Dai-ichi Nuclear Power Plant Accident
Source: PLoS One. 2017 Jan 26;12(1):e0171133. doi: 10.1371/journal.pone.0171133 (PMC5268780; doi:10.1371/journal.pone.0171133)
Supplement: S1 Table — 137Cs values and counting errors are shown. (XLSX) [file pone.0171133.s001.xlsx]

## Sheet: S1_Table_plant_20160920
Prefecture	Site	Sampling year	Sampling date	Species	Category	137Cs (Bq/kg)	Counting errors (Bq/kg)	Error counts per net area counts(%)
Ibaraki	C	2012	2016-06-21	Cryptomeria japonica	Bark	1026.29	23.14	2.25472
Ibaraki	C	2012	2016-06-21	Cryptomeria japonica	Bark	4853.8	32.08	0.660925
Ibaraki	C	2012	2016-06-21	Cryptomeria japonica	Bark	3788.84	51.13	1.34949
Ibaraki	C	2012	2016-09-15	unknown	Bryophytes	6365.39	78.35	1.23088
Ibaraki	C	2012	2016-04-24	unknown	Bryophytes	8833.76	80.04	0.906069
Ibaraki	A	2012	2016-10-24	Collybia neofusipes	Fungi	588.01	22.06	3.75164
Ibaraki	C	2012	2016-10-24	Oligoporus caesius	Fungi	7320.73	153.16	2.09214
Ibaraki	C	2012	2016-10-24	Strobilurus ohshimae	Fungi	5489.46	145.91	2.658
Ibaraki	C	2012	2016-06-21	unknown	Fungi	7023.82	48.85	0.69549
Ibaraki	C	2012	2016-05-30	Arachniodes standishii	Grasses	347.48	7.27	2.09221
Ibaraki	C	2012	2016-06-21	Trachelospermum asiaticum	Grasses	1630.57	24.92	1.5283
Ibaraki	A	2012	2016-05-30	Callicarpa japonica	Leaf_d	397.54	6.15	1.54701
Ibaraki	A	2012	2016-05-30	Lindera umbellata	Leaf_d	857.62	20.04	2.3367
Ibaraki	A	2012	2016-05-30	Padus grayana	Leaf_d	250.04	7.15	2.85954
Ibaraki	A	2012	2016-05-30	Prunus buergeriana	Leaf_d	267.67	3.29	1.22913
Ibaraki	B	2012	2016-05-30	Carpinus laxiflora	Leaf_d	643.61	6.98217	1.08485
Ibaraki	B	2012	2016-05-30	Prunus jamasakura	Leaf_d	132.75	3.24	2.44068
Ibaraki	B	2012	2016-05-30	Quercus serrata	Leaf_d	368.07	4.99	1.35572
Ibaraki	C	2012	2016-05-30	Hydrangea involucrata	Leaf_d	573.93	8.74	1.52283
Ibaraki	C	2012	2016-04-24	Prunus buergeriana	Leaf_d	507.45	18.26	3.59838
Ibaraki	A	2012	2016-05-30	Abies firma	Leaf_e	412.78	11.12	2.69393
Ibaraki	A	2012	2016-05-30	Aucuba japonica	Leaf_e	334.33	11.27	3.37092
Ibaraki	C	2012	2016-04-24	Aucuba japonica	Leaf_e	170.75	8.16	4.77892
Ibaraki	C	2012	2016-05-30	Eurya japonica	Leaf_e	546.28	13.79	2.52435
Fukushima	D	2012	2016-09-19	Quercus serrata	Bark	9301.91	87.88	0.944752
Fukushima	D	2012	2016-09-19	Quercus serrata	Bark	2390.2	28.99	1.21287
Fukushima	E	2012	2016-09-19	Cryptomeria japonica	Bark	7078.92	90.06	1.27223
Fukushima	E	2012	2016-09-19	Cryptomeria japonica	Bark	34341.8	202.35	0.589223
Fukushima	E	2012	2016-09-19	Cryptomeria japonica	Bark	5500.91	66.41	1.20725
Fukushima	F	2012	2016-09-09	Cryptomeria japonica	Bark	98998.3	374.15	0.377936
Fukushima	E	2012	2016-09-08	Phragmites japonica	Grasses	62.24	3.14	5.04499
Fukushima	E	2012	2016-09-08	Sasa nipponica	Grasses	652.13	20.38	3.12514
Fukushima	F	2012	2016-09-09	Pteridium aquilinum	Grasses	56.27	3.29	5.84681
Fukushima	D	2012	2016-09-09	Quercus serrata	Leaf_d	955.68	28.55	2.9874
Fukushima	F	2012	2016-09-09	Prunus maximowiczii	Leaf_d	1966.41	29.62	1.5063
Fukushima	F	2012	2016-09-09	Quercus serrata	Leaf_d	454.44	14.37	3.16213
Fukushima	E	2012	2016-09-08	Abies firma	Leaf_e	1273.48	22.61	1.77545
Fukushima	E	2012	2016-09-09	Chamaecyparis obtusa	Leaf_e	11073	120.1	1.08462
Fukushima	E	2012	2016-09-08	Cryptomeria japonica	Leaf_e	2470.01	39.45	1.59716
